# Supplementary material for: A high-performance genetically encoded fluorescent indicator for in vivo cAMP imaging
Source: PubMed Central journal article supplement (PMC9468011; doi:10.1038/s41467-022-32994-7), 2022-09-12
Supplement: 41467_2022_32994_MOESM1_ESM.pdf [file 41467_2022_32994_MOESM1_ESM.pdf]

1           **A high-performance genetically encoded fluorescent indicator**

2                           **for *in vivo* cAMP imaging**

3  
4   Liang Wang, Chunling Wu, Wanling Peng, Ziliang Zhou, Jianzhi Zeng, Xuelin Li, Yini  
5   Yang, Shuguang Yu, Ye Zou, Mian Huang, Chang Liu, Yefei Chen, Yi Li, Panpan Ti,  
6   Wenfeng Liu, Yufeng Gao, Wei Zheng, Haining Zhong, Shangbang Gao, Zhonghua Lu,  
7   Pei-Gen Ren, Ho Leung Ng, Jie He, Shoudeng Chen, Min Xu, Yulong Li, Jun Chu

8  
9   **Contents:**

10   **1. Supplementary Figures**

11   **2. Supplementary Tables**

12   **3. Supplementary References**

13  
14  
15  
16  
17  
18  
19  
20  
21  
22  
23

24 **1. Supplementary Figures**

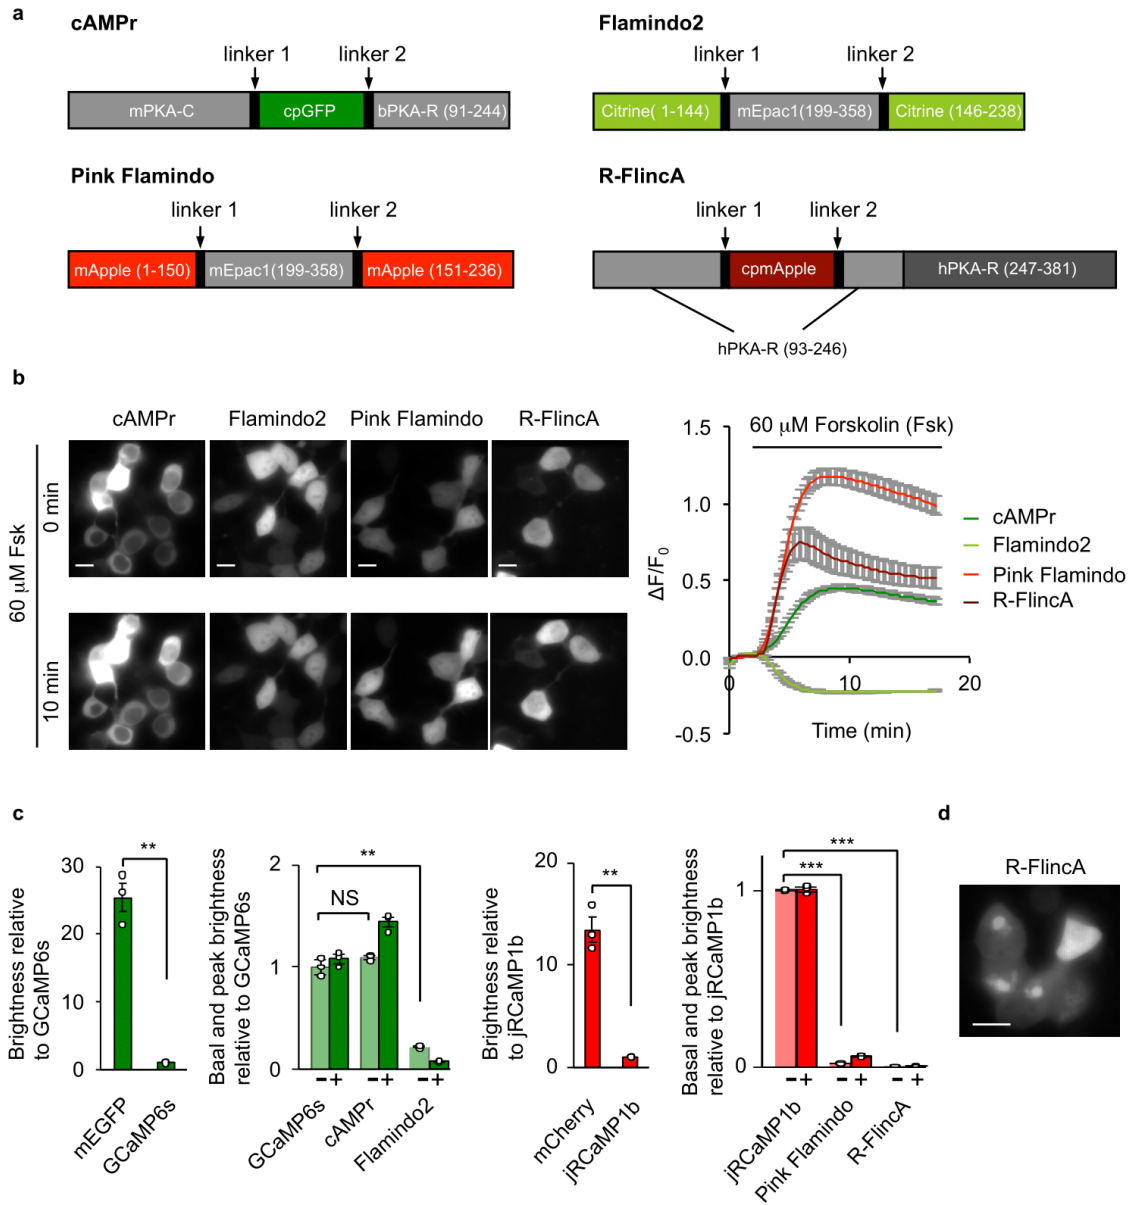

25

26 **Supplementary Fig. 1 Key properties of previously reported single FP-based cAMP**  
 27 **sensors in HEK293T cells at 37°C.**

28 (a) Schematic of cAMPr, Flamindo2, Pink Flamindo and R-FlincA sensors. PKA-C and  
 29 PKA-R represent PKA catalytic and regulatory subunit, respectively. mPKA, bPKA and  
 30 hPKA are mouse, bovine and human PKA, respectively. mEpac1 is mouse Epac1. GFP,

31 Citrine and mApple are fluorescent proteins. In R-Flnca, cpmApple was inserted into  
32 the first CNBD of PKA-R.

33 (b) Representative fluorescence images (left) and traces of  $\Delta F/F_0$  (right) of cAMP sensors  
34 in response to 60  $\mu\text{M}$  Forskolin (Fsk) in HEK293T cells. Notably, the image contrasts for  
35 different sensors were different to render fluorescence visible. Data are shown as mean  $\pm$   
36 SEM.  $n = 33$  cells (cAMPPr), 42 cells (Flamindo2), 34 cells (Pink Flamindo) and 18 cells  
37 (R-Flnca) from 3 cultures for each sensor. Scale bars: 10  $\mu\text{m}$ .

38 (c) Basal and peak brightness of the green cAMP sensors (cAMPPr and Flamindo2) and  
39 red cAMP sensors (Pink Flamindo and R-Flnca) in HEK293T cells before and 15 min  
40 after 60  $\mu\text{M}$  Fsk stimulation. Brightness of green and red cAMP sensors were normalized  
41 to those of the green calcium sensor GCaMP6s and the red calcium sensor jRCaMP1b,  
42 respectively. The brightness of GFP and mCherry were also normalized to GCaMP6s and  
43 jRCaMP1b, respectively. Data are shown as mean  $\pm$  SEM.  $n = 3$  wells from 12-well  
44 plates for each sensor. Two-tailed Student's  $t$ -tests were performed.  $P = 0.008$  between  
45 mEGFP and GCaMP6s,  $P = 0.2039$  between GCaMP6s and cAMPPr,  $P = 0.0035$  between  
46 GCaMP6s and Flamindo2.  $P = 0.0097$  between mCherry and jRCaMP1b,  $P = 8.4 \times 10^{-8}$   
47 between jRCaMP1b and Pink Flamindo2,  $P = 8.7 \times 10^{-6}$  between jRCaMP1b and R-  
48 Flnca. The minus and plus signs denote without and with Fsk treatment, respectively.

49 (d) R-Flnca formed puncta in HEK293T cells after 48 h transfection. Representative  
50 image from 3 independent experiments is shown. Scale bar: 10  $\mu\text{m}$ .  $***P < 0.001$ ,  $**P <$   
51  $0.01$  and NS, not significant.

52 Source data are provided as a Source Data file.

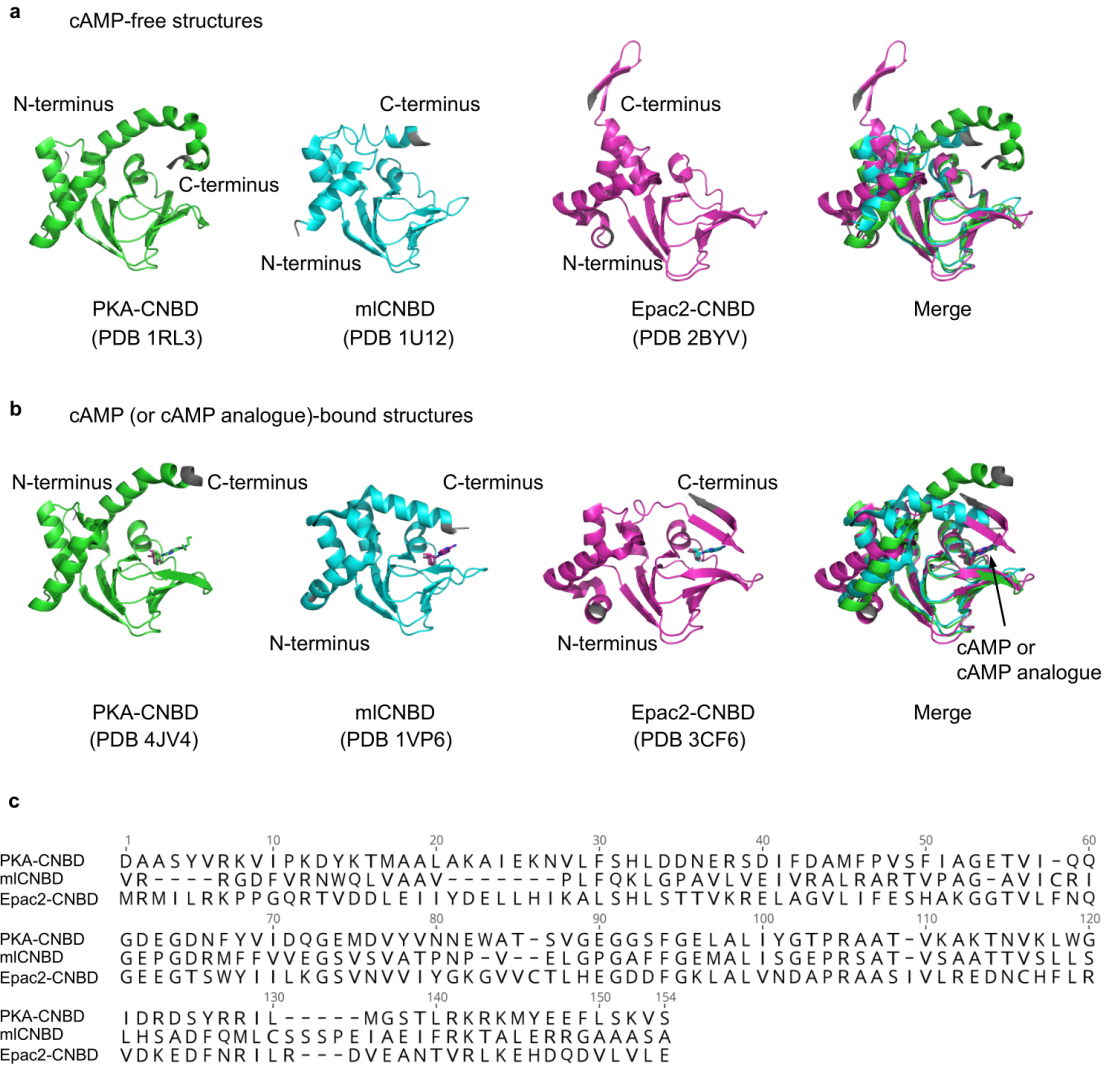

53

54 **Supplementary Fig. 2 Structure and amino acid sequence alignments of CNBDs**  
 55 **from bovine PKA, mouse Epac2 and bacterial MlotiK1 channel.**

56 (a) Structures of different cAMP-free CNBDs.

57 (b) Structures of different cAMP (or its analogue)-bound CNBDs. cAMP or its analogue  
 58 molecules are shown as stick models. Protein termini are highlighted in grey.

59 (c) Protein sequence alignment of CNBDs.

60

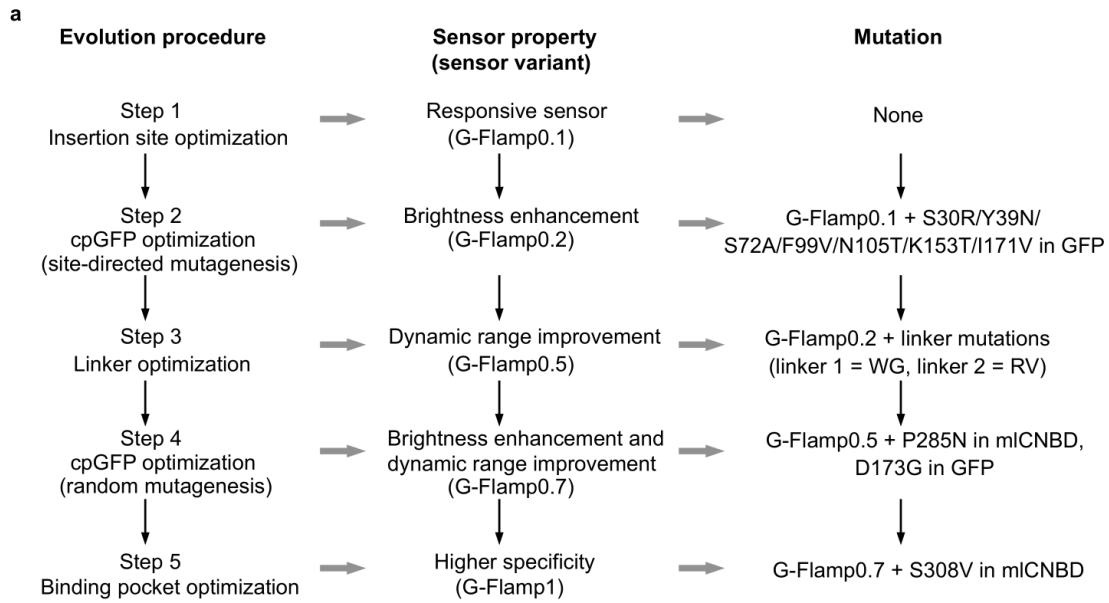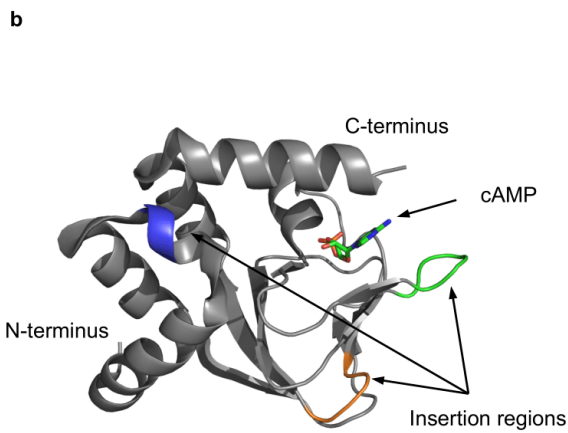

**c**

| Insertion site                    | $\Delta F/F_0$<br>(excited at 488 nm) |
|-----------------------------------|---------------------------------------|
| Gln237-Lys238                     | 0.012                                 |
| Lys238-Leu239                     | -0.021                                |
| Ala283-Thr284                     | -0.004                                |
| Thr284-Pro285                     | -0.009                                |
| <b>Pro285-Asn286 (G-Flamp0.1)</b> | <b>-0.258</b>                         |
| Asn286-Pro287                     | 0.076                                 |
| Pro287-Val288                     | -0.126                                |
| Ala313-Ala314                     | 0.009                                 |
| Ala314-Thr315                     | -0.034                                |
| Thr315-Thr316                     | -0.005                                |
| Thr316-Val317                     | 0.014                                 |

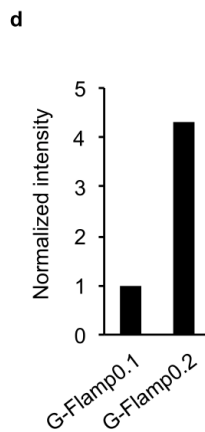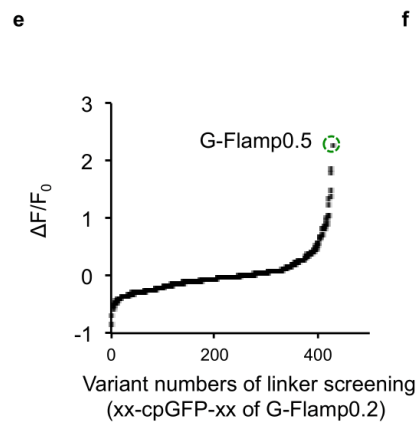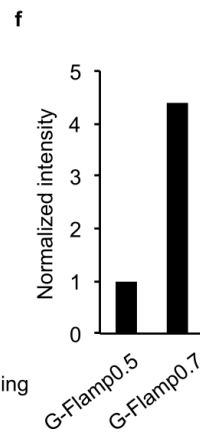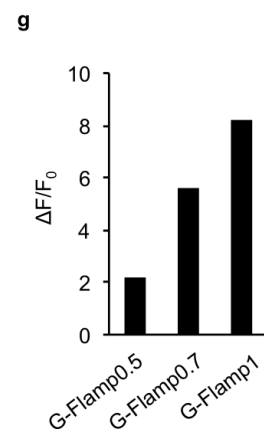

61

62 **Supplementary Fig. 3 Evolution of G-Flamp1.**

- 63 (a) Five-step directed evolution procedure of G-Flamp1.
- 64 (b) Three insertion regions tested are highlighted in blue, green and orange in mICNBD's  
65 structure (PDB 1VP6).
- 66 (c)  $\Delta F/F_0$  of 11 G-Flamp variants with different insertion sites in response to 500  $\mu\text{M}$   
67 cAMP. The variant with the insertion site between Pro285 and Asn286 (named G-  
68 Flamp0.1) showed the largest fluorescence change. The color coding matches the one in  
69 **b**.
- 70 (d) The brightness of G-Flamp0.1 and G-Flamp0.2 in bacterial cells cultured overnight at  
71 34°C.
- 72 (e)  $\Delta F/F_0$  of 427 G-Flamp0.2 variants with different linkers in response to 500  $\mu\text{M}$   
73 cAMP. The variant with the linkers 'WG' and 'RV' (named G-Flamp0.5) showed the  
74 greatest fluorescence change. Source data are provided as a Source Data file.
- 75 (f) The brightness of G-Flamp0.5 and G-Flamp0.7 in bacterial cells cultured overnight at  
76 34°C.
- 77 (g)  $\Delta F/F_0$  of G-Flamp0.5, G-Flamp0.7 and G-Flamp1 under excitation at 488 nm.

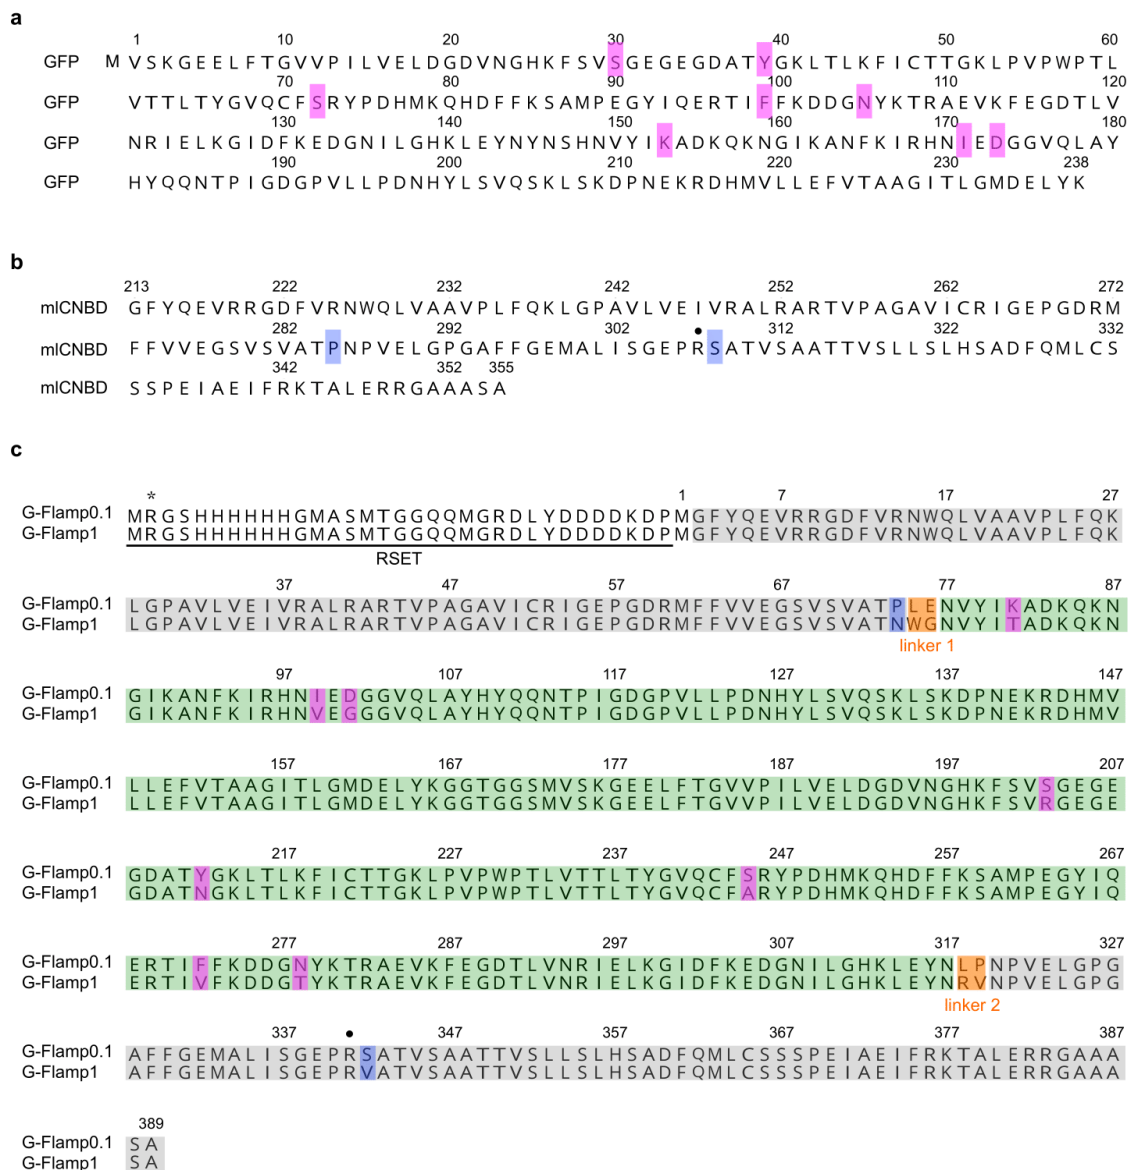

GFP : GFP sequence is modified from cpGFP of GCaMP6f.

RSET : RSET peptide is required for the large  $\Delta F/F_0$  of G-Flamp1.

• : R307E in miCNBD for cAMP-insensitive mutant sensor.

\* : R(Arg) deleted for mammalian expression.

78

79 **Supplementary Fig. 4 Protein sequences of GFP, miCNBD, G-Flamp0.1 and G-**  
80 **Flamp1.**

81 (a-b) Protein sequences of GFP and mICNBD. The numberings of GFP and mICNBD are  
82 according to PDB 2Y0G and 1VP6, respectively. Modified amino acid residues in G-  
83 Flamp1 sensor are highlighted in magenta and blue.

84 (c) Sequence alignment of full-length G-Flamp0.1 and G-Flamp1. The numbering is  
85 according to PDB 6M63. Modified amino acid residues are highlighted in magenta, blue  
86 and orange. Note the amino acid Arg immediately after the initiator methionine in G-  
87 Flamp1 was deleted for mammalian expression. Source data are provided as a Source  
88 Data file.

89

90

91

92

93

94

95

96

97



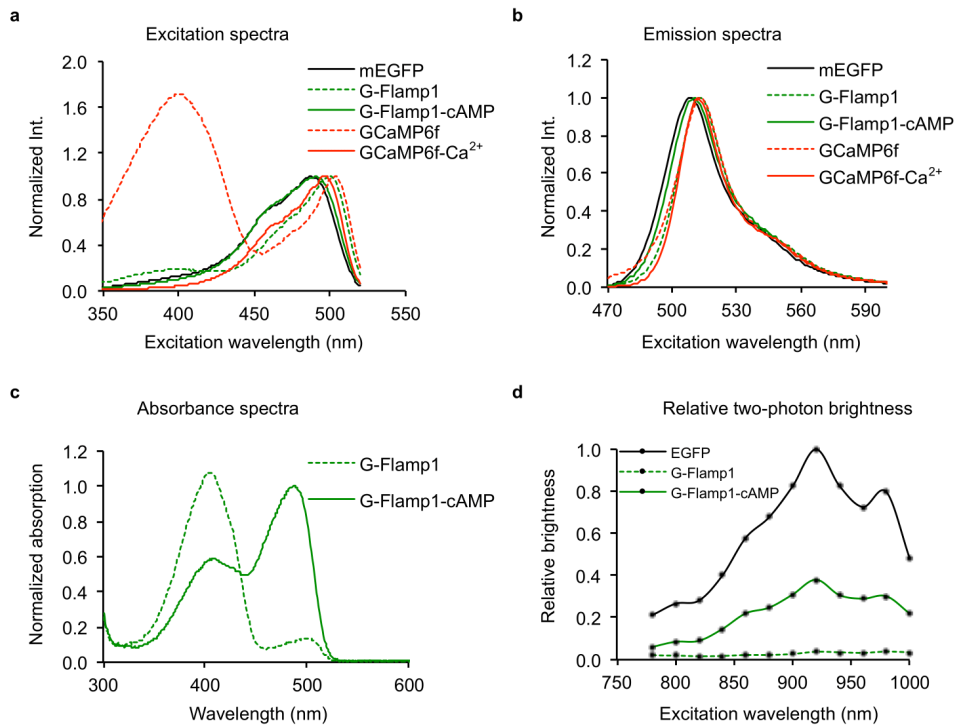

98

99 **Supplementary Fig. 5 Fluorescence and absorption spectra of purified G-Flamp1,**  
 100 **mEGFP and GCaMP6f.**

101 (a-b) Excitation (a) and emission (b) spectra of mEGFP, cAMP-free G-Flamp1, cAMP-  
 102 bound G-Flamp1, calcium-free GCaMP6f and calcium-bound GCaMP6f.

103 (c) Absorption spectra of 20  $\mu\text{M}$  purified G-Flamp1 in HEPES buffer in the presence or  
 104 absence of 500  $\mu\text{M}$  cAMP.

105 (d) Relative brightness at different excitation wavelengths under two-photon excitation.

106 Source data are provided as a Source Data file.

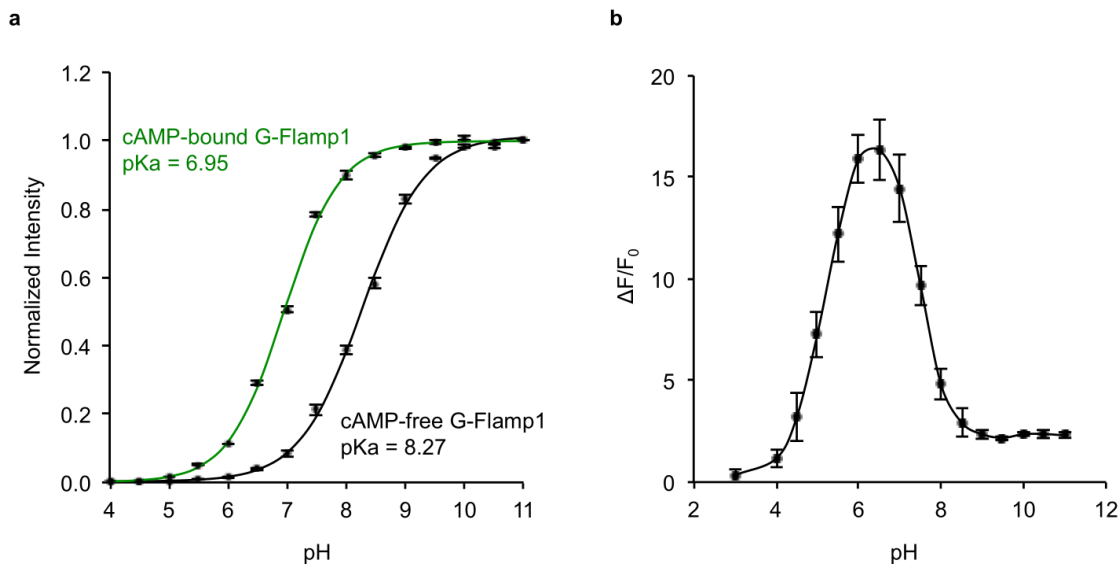

107

108 **Supplementary Fig. 6 pH-dependent fluorescence and fluorescence change of**  
 109 **purified G-Flamp1.**

110 (a) Normalized fluorescence of purified G-Flamp1 (2 μM) at various pH values in the  
 111 presence or absence of 500 μM cAMP. Fitted data are shown as solid lines.

112 (b)  $\Delta F/F_0$  of purified G-Flamp1 (2 μM) in buffers with different pH values.

113 Data are presented as mean  $\pm$  SEM. n = 3 independent experiments. Source data are  
 114 provided as a Source Data file.

115

116

117

118

119

120

121

122

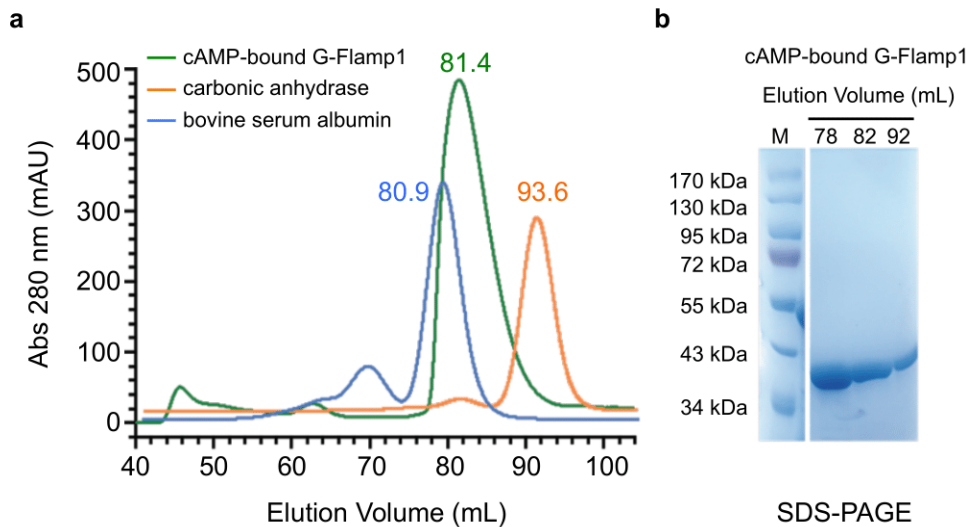

123

124 **Supplementary Fig. 7 Gel filtration chromatography of G-Flamp1.**

125 (a) The size-exclusion chromatogram for the cAMP-bound G-Flamp1 indicator without  
 126 the RSET peptide (42.6 kDa) and standard molecular weight proteins (carbonic  
 127 anhydrase, 29 kDa; bovine serum albumin, 66 kDa). 850  $\mu$ L of 29.8 mg/mL (0.7 mM) G-  
 128 Flamp1 was loaded into the column (Hiload 16/600 Superdex 200 pg column, GE  
 129 Healthcare).

130 (b) SDS-PAGE of purified cAMP-bound G-Flamp1 using 10% gel. All eluted fractions  
 131 showed specific bands with a molecular weight of  $\sim$ 43 kDa. Representative image from 3  
 132 independent experiments is shown.

133 Source data are provided as a Source Data file.

134

135

136

137

138

139

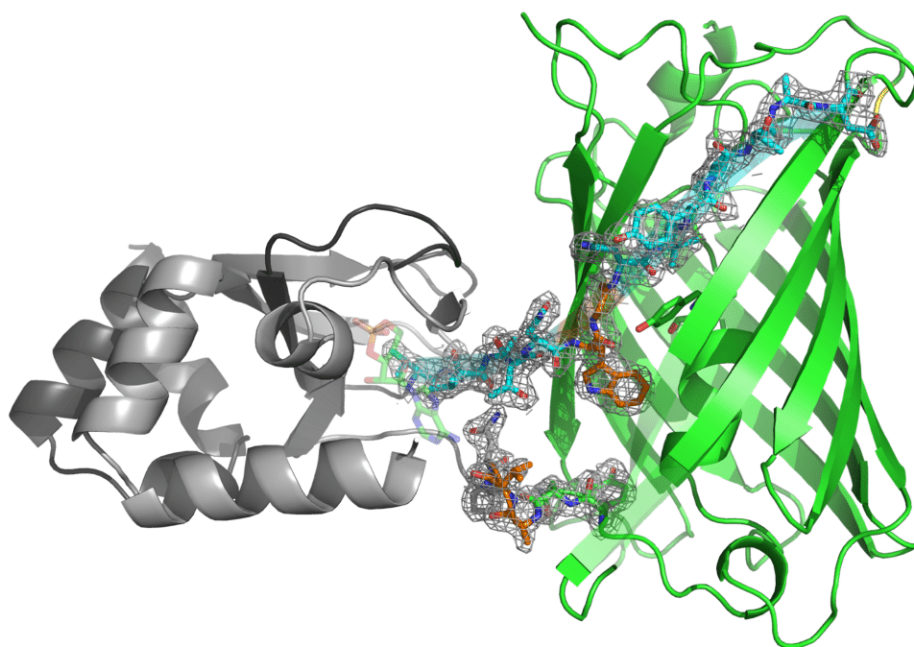

140

141 **Supplementary Fig. 8** Crystal structure of cAMP-bound G-Flamp1 (PDB: 6M63) with  
142 electron density on both two linkers and their neighboring residues. The mesh depicts  
143 electron density in the 2Fo-Fc map contoured to 1.2 sigma within 2.0 Å of the atoms  
144 displayed in stick form.

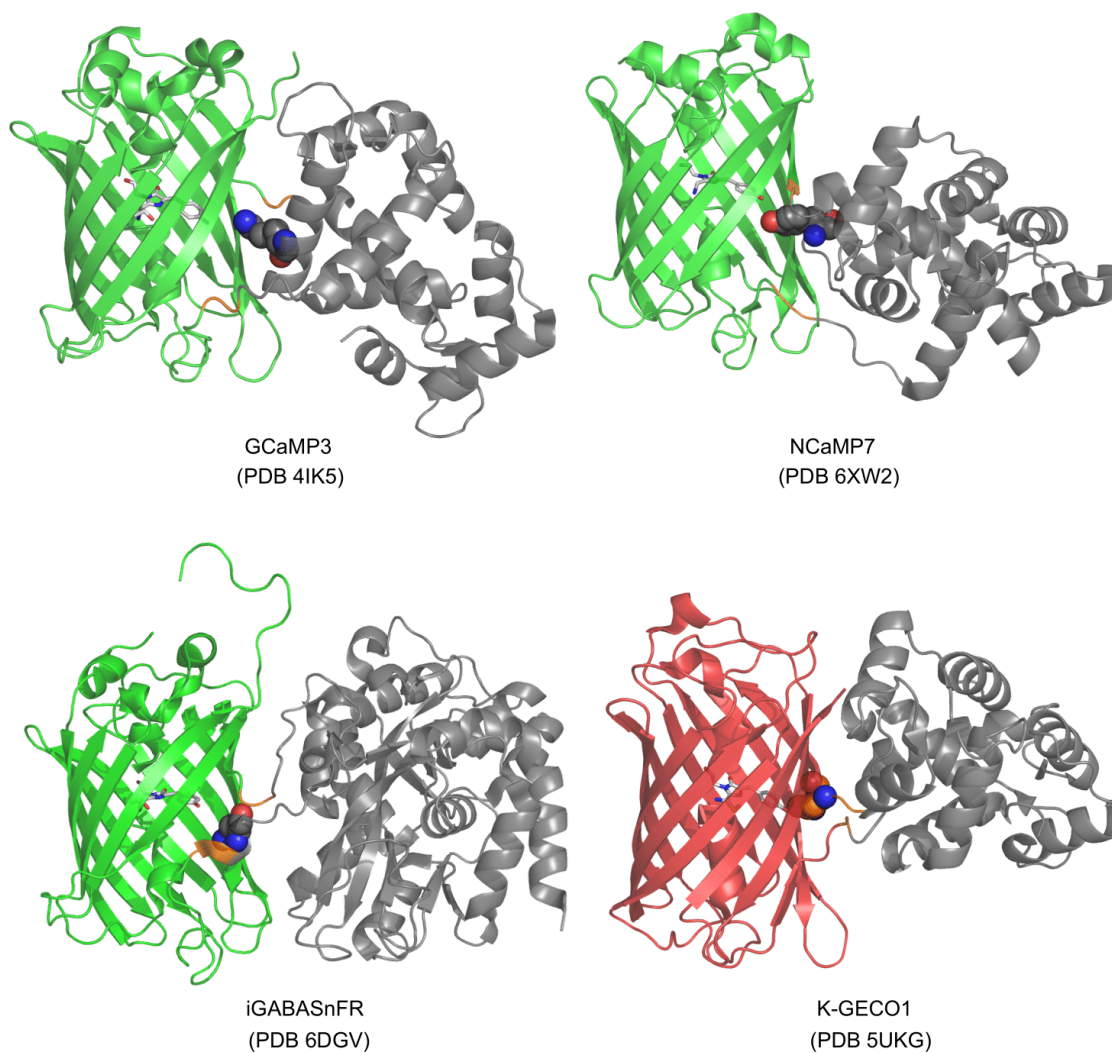

145

146 **Supplementary Fig. 9 Linker conformation and the interactions between key**

147 **residues and chromophore in other single-FP indicators.** FPs, linkers and sensing

148 domains are marked in green/red, orange and grey, respectively. All chromophores in the

149 FP are shown as stick and amino acid residues interacting with the phenolic oxygen of

150 the chromophore are shown as sphere. In iGABASnFR, the linker 2 folds as  $\alpha$ -helix.

151 Unlike GCaMP3 and NCaMP7, in which the fluorescence modulation is dependent on

152 the interactions with residues of CaM, the fluorescence change in K-GECO1 is mediated  
153 by a residue from linker 1.

154

155

156

157

158

159

160

161

162

163

164

165

166

167

168

169

170

171

172

173

174

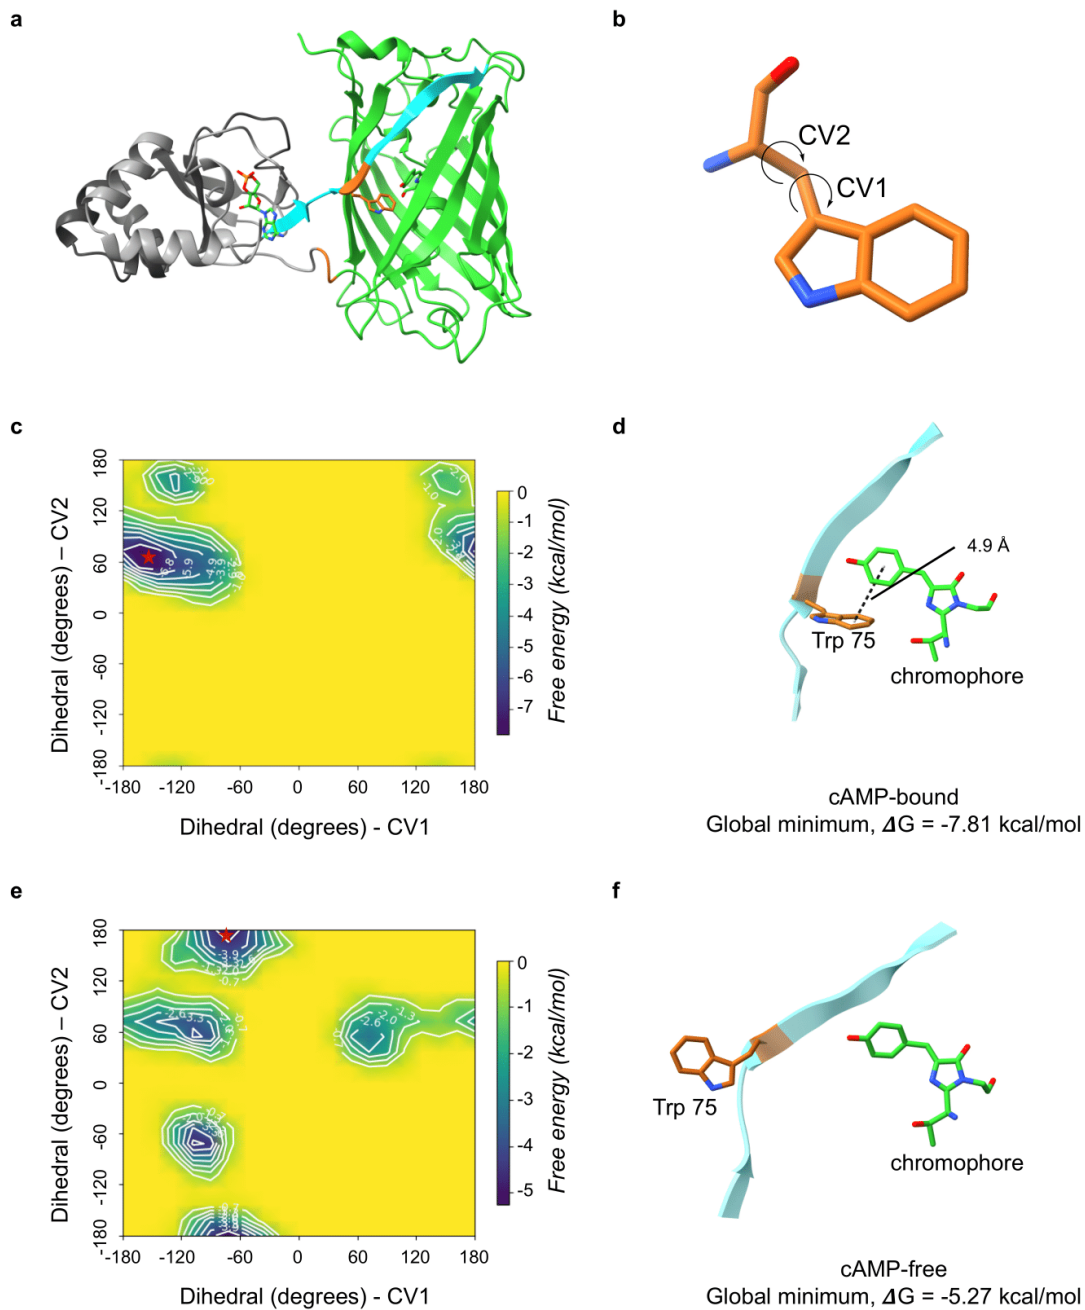

175

176 **Supplementary Fig. 10 Stable cAMP-bound and cAMP-free structures predicted by**  
 177 **the metadynamics molecular dynamics simulations.**

178 (a) The simulated cAMP-bound G-Flamp1 structure at global minimum.

179 (b) The two dihedral angles picked for collective variables (CVs).

180 (c) Free energy landscape of the cAMP-bound form at 300 K. The red star shows the  
181 global minima (lowest-energy pose) and its free energy was -7.81 kcal/mol.

182 (d) The cAMP-bound conformation at global minimum. The side chain of Trp 75 is close  
183 to the chromophore. There is a pi-stacking interaction between the side chain of Trp 75  
184 and the chromophore.

185 (e) Free energy landscape of cAMP-free form at 300K. The red star shows the global  
186 minima (lowest-energy pose) and its free energy was -5.27 kcal/mol.

187 (f) The cAMP-free conformation at global minimum. The side chain of Trp 75 moves  
188 away from the chromophore.

189

190

191

192

193

194

195



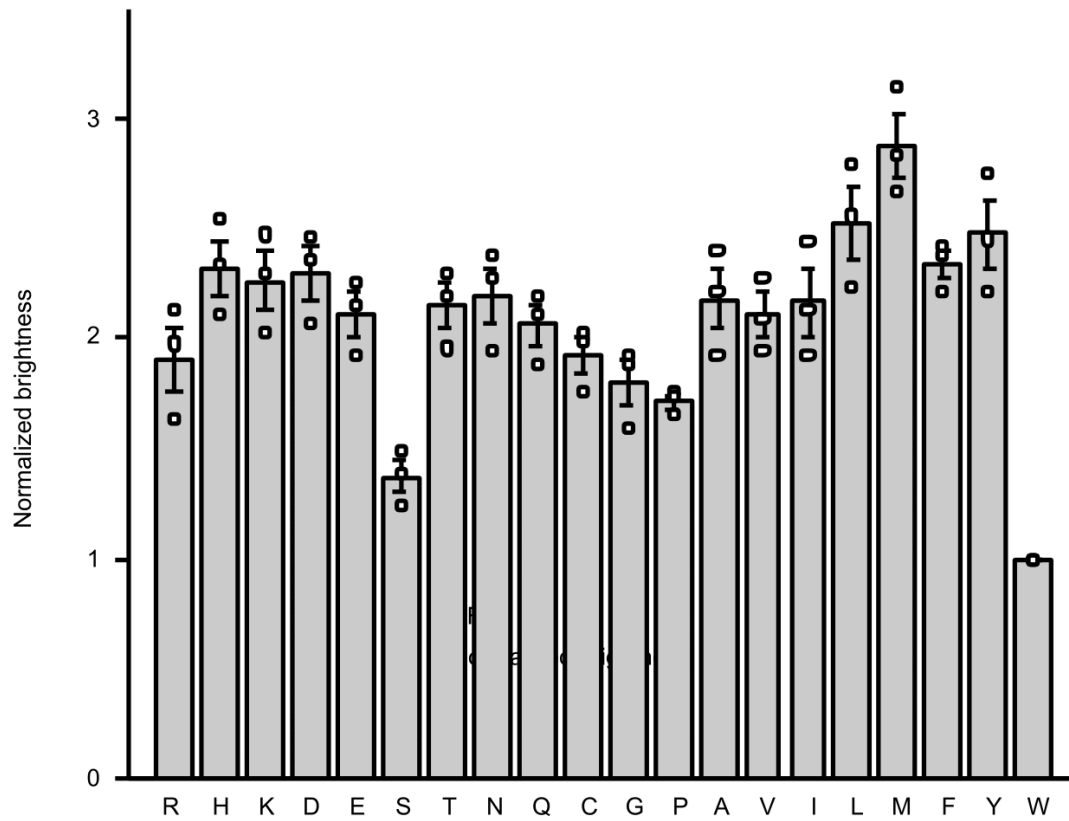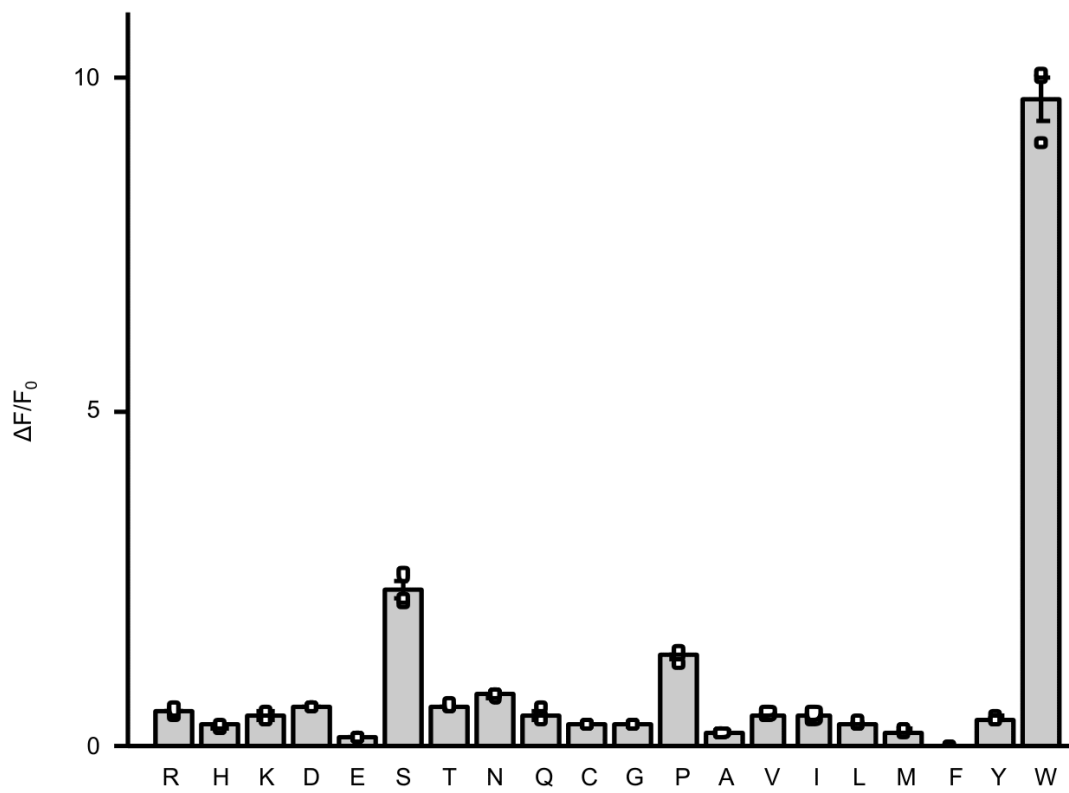

G-Flamp1

197 **Supplementary Fig. 11 Saturation mutagenesis of Trp75 in G-Flamp1 sensor.** Basal  
198 brightness (up) and  $\Delta F/F_0$  (bottom) for each variant were shown. Error bars indicate SEM  
199 of the mean from 3 independent experiments. Source data are provided as a Source Data  
200 file.

201

202

203

204

205

206

207

208

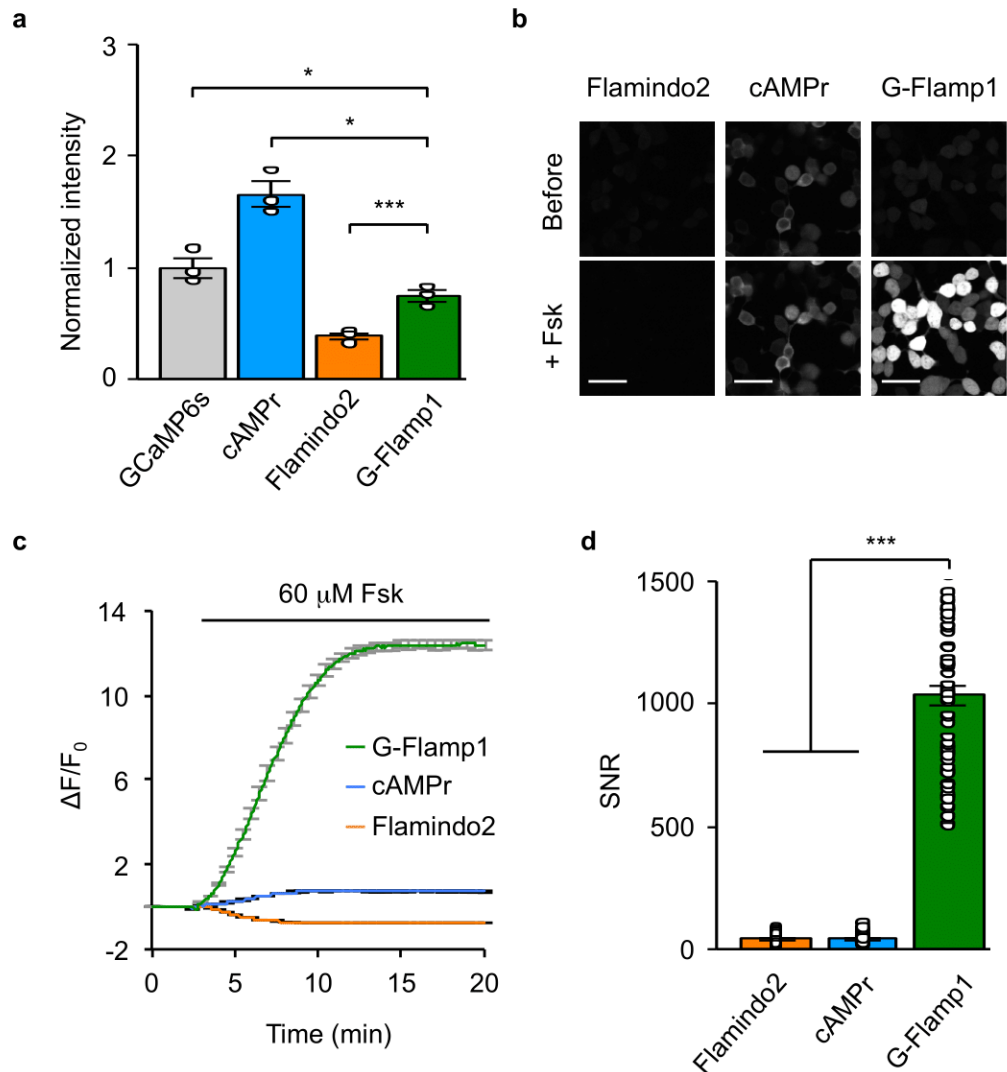

209

210 **Supplementary Fig. 12 Performance of G-Flamp1 in HEK293T cells under two-**  
 211 **photon imaging.**

212 (a) Brightness comparison of three different green cAMP sensors (cAMPr, Flamindo2  
 213 and G-Flamp1) and GCaMP6s. Images were taken after 48 hours transfection under two-  
 214 photon excitation (920 nm).  $n = 3$  cultures for each sensor. Two-tailed Student's  $t$ -tests  
 215 were performed.  $P = 0.044$ ,  $0.017$  and  $1.9 \times 10^{-4}$  between G-Flamp1 and GCaMP6s,  
 216 cAMPr and Flamindo2, respectively.

217 (b-c) Representative two-photon fluorescence images (b) and traces of  $\Delta F/F_0$  (c) of  
218 HEK293T cells expressing cAMP sensors in response to 60  $\mu\text{M}$  Fsk.  $n = 76$  cells  
219 (Flamindo2), 35 cells (cAMPr) and 64 cells (G-Flamp1) from 2 separate experiments.

220 Scale bars: 50  $\mu\text{m}$ .

221 (d) Signal-to-noise ratio (SNR) of different sensors in (c). Two-tailed Student's  $t$ -tests  
222 were performed.  $P = 6.1 \times 10^{-33}$  between G-Flamp1 and Flamindo2, and  $P = 4.7 \times 10^{-33}$   
223 between G-Flamp1 and cAMPr.

224 All data are shown as mean  $\pm$  SEM in **a**, **c** and **d**. \*\*\* $P < 0.001$  and \* $P < 0.05$ . Source  
225 data are provided as a Source Data file.

226

227

228

229

230

231

232

233

234

235

236

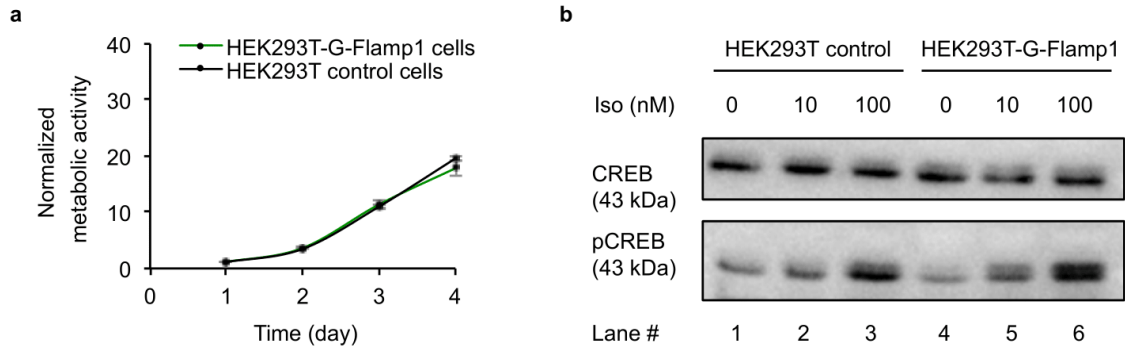

237

238

239 **Supplementary Fig. 13 Effects of G-Flamp1 expression on HEK293T proliferation**  
 240 **and cAMP signaling.**

241 (a) Proliferation rates of HEK293 cells (control) and stable HEK293T cells expressing G-  
 242 Flamp1 (HEK293T-G-Flamp1) were measured using the CCK-8 assay. Data are shown  
 243 as mean  $\pm$  SEM from 3 independent experiments.

244 (b) Western blot analysis of phosphorylated CREB (pCREB) in cells induced by 10 nM  
 245 or 100 nM Iso for 1 hour. Representative images from 3 separate experiments are shown.  
 246 Lanes 1-3 and 4-6 were the lysates of serum-starved control and stable HEK293T cells  
 247 expressing G-Flamp1 (HEK293T-G-Flamp1), respectively.

248 Source data are provided as a Source Data file.

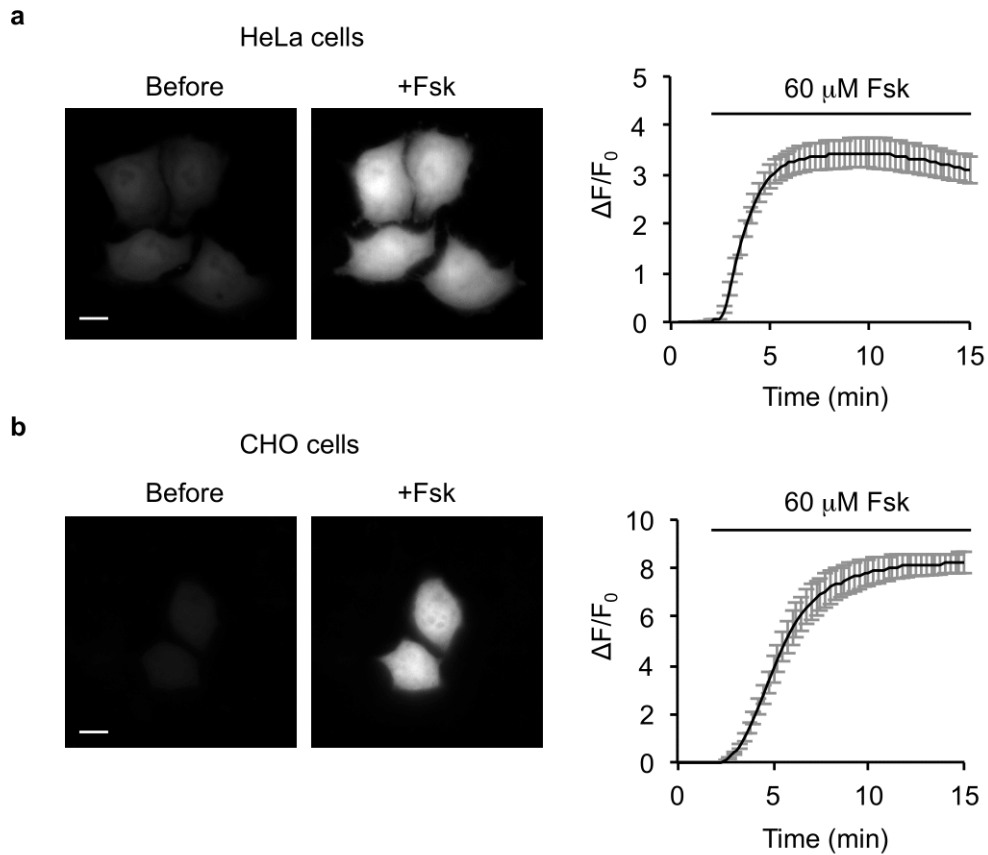

249

250 **Supplementary Fig. 14  $\Delta F/F_0$  of G-Flamp1 in HeLa and CHO cells.**

251 (a) Representative fluorescence images (left) and  $\Delta F/F_0$  traces (right) of HeLa cells  
 252 expressing G-Flamp1 in response to 60  $\mu\text{M}$  Fsk. n = 18 cells from 2 cultures.

253 (b) Same as **a** except that the mammalian cell line used was CHO. n = 13 cells from 6  
 254 cultures.

255 Data are shown as mean  $\pm$  SEM. Scale bars: 10  $\mu\text{m}$ . Source data are provided as a Source

256 Data file.

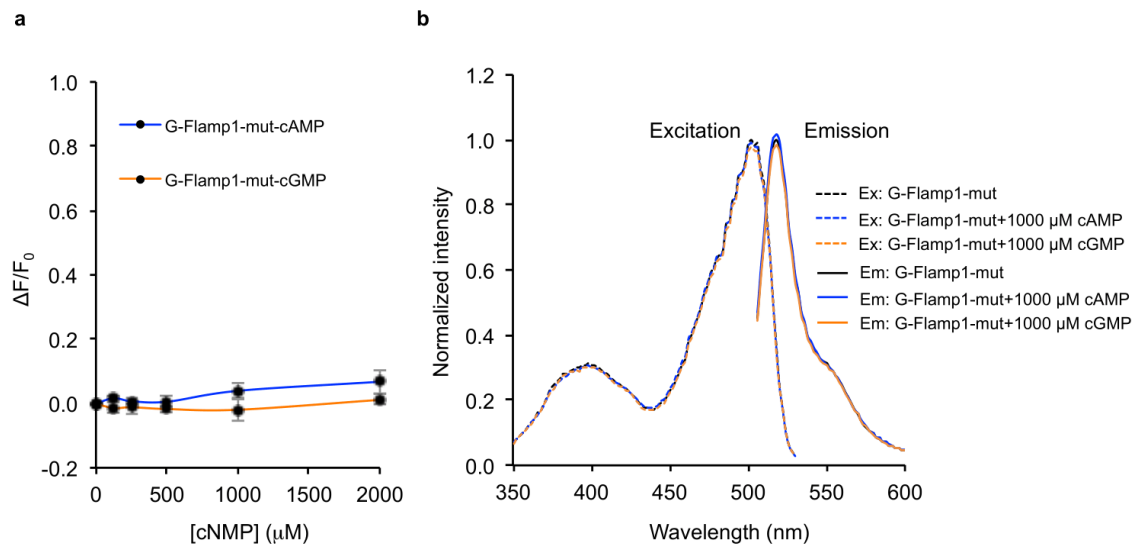

257

258 **Supplementary Fig. 15 The responses of G-Flamp1-mut to cAMP or cGMP *in vitro*.**

259 (a)  $\Delta F/F_0$  of purified G-Flamp1-mut in response to various concentrations of cAMP or  
 260 cGMP. The fluorescence under excitation at 450 nm was collected. Data are shown as  
 261 mean  $\pm$  SEM from 3 independent experiments.

262 (b) Excitation and emission spectra of purified G-Flamp1-mut without cAMP or cGMP  
 263 (black), with 1000  $\mu\text{M}$  cAMP (blue) and with 1000  $\mu\text{M}$  cGMP (orange). Ex and Em stand  
 264 for excitation and emission, respectively.

265 Source data are provided as a Source Data file.

266

267

268

269

270

271

272

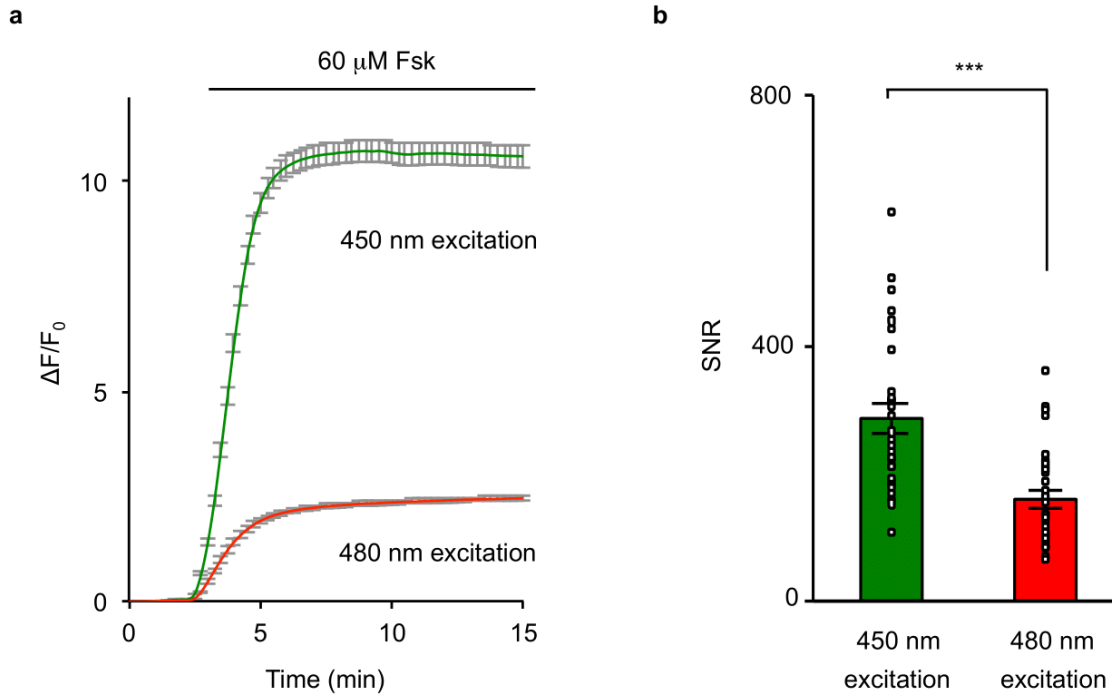

273

274 **Supplementary Fig. 16  $\Delta F/F_0$  and signal-to-noise ratio (SNR) of G-Flamp1 in**  
 275 **HEK293T cells under 450 nm and 480 nm excitations.**

276 (a) Representative traces of  $\Delta F/F_0$  of HEK293T cells stably expressing G-Flamp1 in  
 277 response to 60  $\mu\text{M}$  Fsk.  $n = 30$  cells (450 nm excitation) and 32 cells (480 nm excitation)  
 278 from 3 cultures.

279 (b) SNRs of G-Flamp1 under 450 nm and 480 nm excitations.  $n = 30$  cells (450 nm  
 280 excitation) and 32 cells (480 nm excitation) over 3 independent experiments. Two-tailed  
 281 Student's  $t$ -test was performed.  $P = 1.1 \times 10^{-5}$  between the two groups.

282 All data are shown as mean  $\pm$  SEM in **a** and **b**. \*\*\* $P < 0.001$ . Source data are provided as  
 283 a Source Data file.

284

285

286



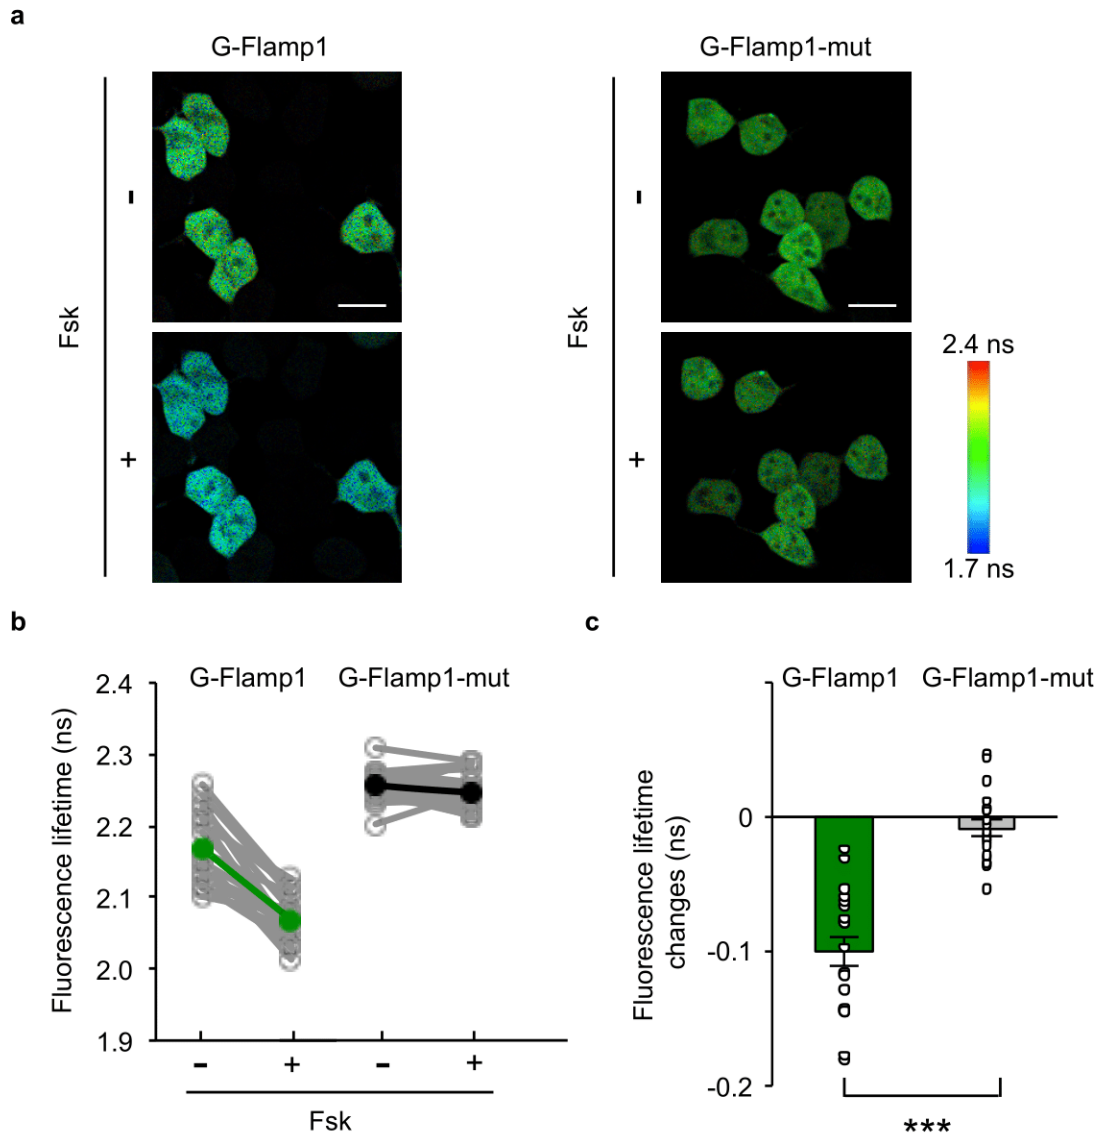

287

288 **Supplementary Fig. 17 Fluorescence lifetime changes of G-Flamp1 in HEK293T**  
 289 **cells.**

290 (a) Representative fluorescence lifetime images of HEK293T cells expressing G-Flamp1  
 291 or G-Flamp1-mut before and 10 min after 60  $\mu$ M Fsk stimulation from 3 independent  
 292 experiments. The minus and plus signs denote without and with Fsk treatment,  
 293 respectively. Scale bars: 20  $\mu$ m.

294 (b) Summary of the fluorescence lifetimes of G-Flamp1 and G-Flamp1-mut in HEK293T  
295 cells before and after 60  $\mu$ M Fsk treatment. n = 20 cells for both G-Flamp1 and G-  
296 Flamp1-mut groups from 3 cultures. Individual data points from single cells and their  
297 averages are indicated by gray and green/black circles, respectively.

298 (c) Fluorescence lifetime changes for G-Flamp1 and G-Flamp1-mut in b. Data are  
299 presented as mean  $\pm$  SEM. Two-tailed Student's *t*-test was performed.  $P = 1.3 \times 10^{-8}$   
300 between the two groups. \*\*\* $P < 0.001$ .

301 Source data are provided as a Source Data file.

302

303

304

305

306

307

308

309

310

311

312

313

314

315

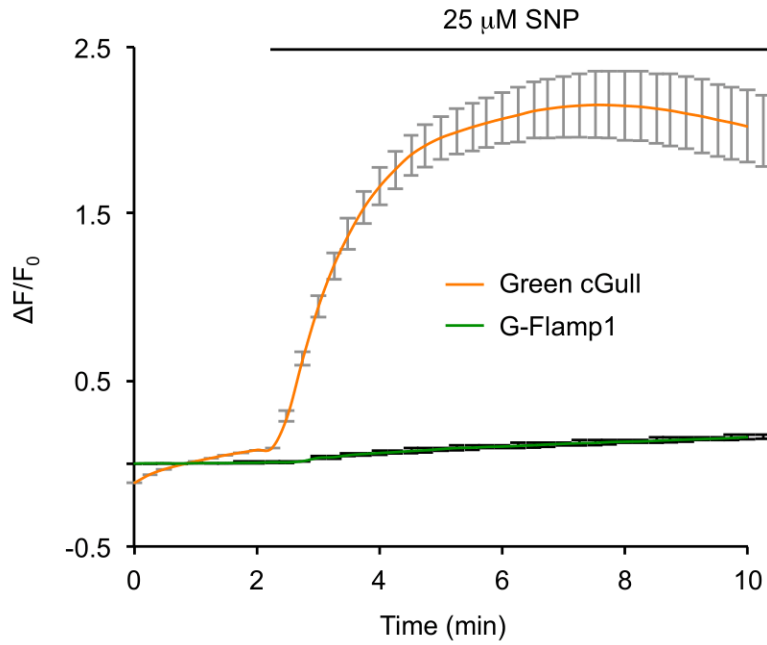

316

317 **Supplementary Fig. 18  $\Delta F/F_0$  of Green cGull and G-Flamp1 in response to 25  $\mu\text{M}$**   
 318 **SNP in HEK293T cells.**

319 Representative traces of  $\Delta F/F_0$  of HEK293T cells expressing Green cGull or G-Flamp1.

320 Data are shown as mean  $\pm$  SEM. n = 22 cells for Green cGull and n = 15 cells for G-

321 Flamp1 from 3 cultures for both. Source data are provided as a Source Data file.

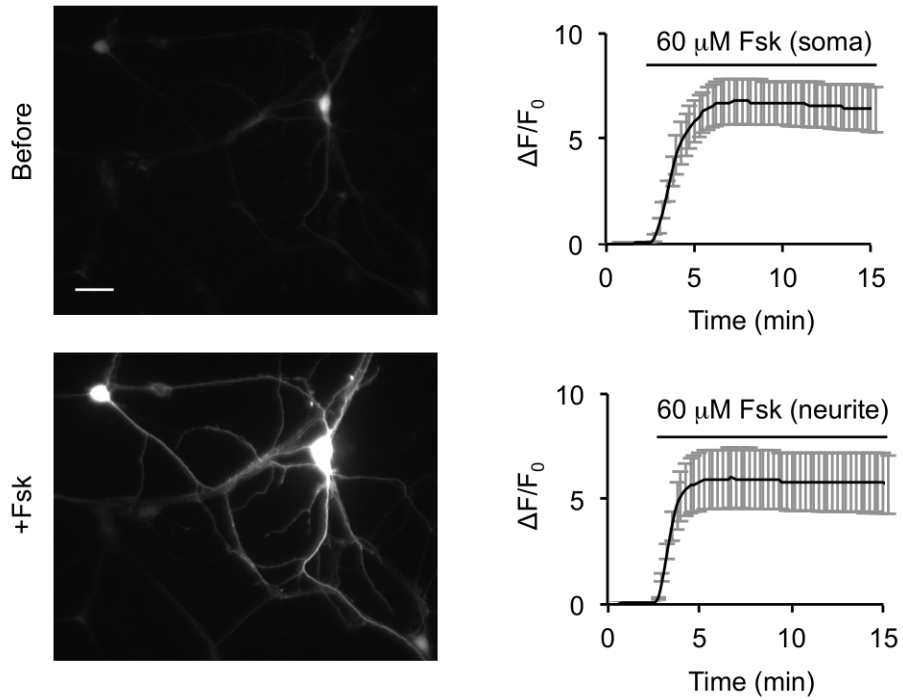

322

323 **Supplementary Fig. 19  $\Delta F/F_0$  of G-Flamp1 in cultured cortical neurons in response**  
 324 **to 60  $\mu$ M Fsk.**

325 Representative fluorescence images (left) and traces of  $\Delta F/F_0$  (right) of cortical neurons  
 326 expressing G-Flamp1 in response to 60  $\mu$ M Fsk. Data are shown as mean  $\pm$  SEM. n = 6  
 327 ROIs of 6 neurons for both soma and neurites. Curves are shown as mean  $\pm$  SEM. Scale  
 328 bar: 20  $\mu$ m.

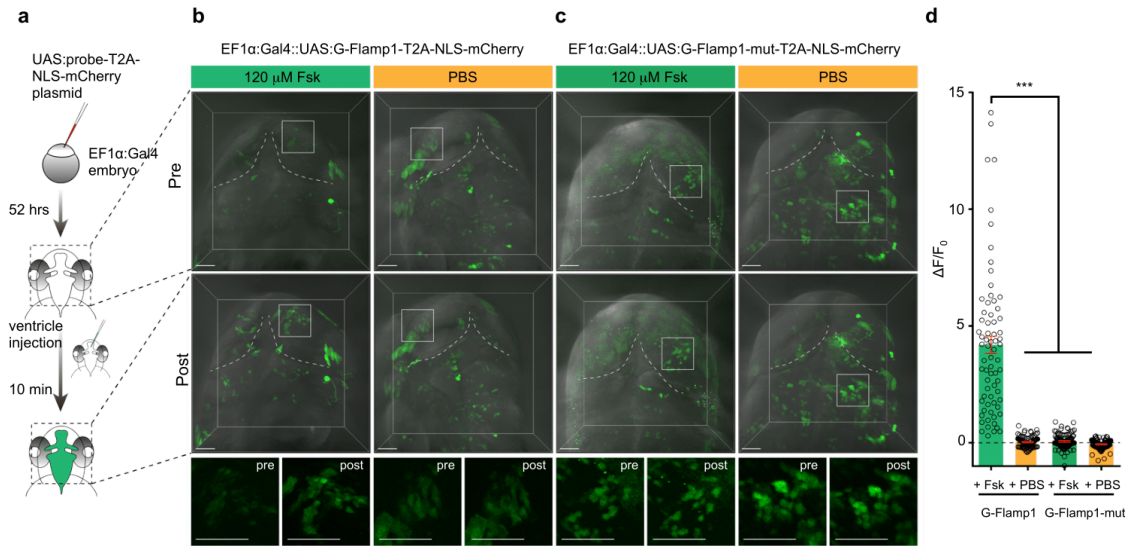

329

330 **Supplementary Fig. 20 Performance of G-Flamp1 in zebrafish.**

331 (a) Schematic drawing for the experiments in zebrafish.

332 (b) Representative fluorescent images of G-Flamp1 before and after 120 μM Fsk or PBS  
 333 injection from 4 (for Fsk) and 3 (for PBS) independent experiments. High-magnification  
 334 images of the boxed areas are shown below. Scale bars: 50 μm.

335 (c) Similar as **b** except that G-Flamp1-mut-T2A-NLS-mCherry plasmid was used.  
 336 Representative fluorescent images of G-Flamp1-mut before and after 120 μM Fsk or PBS  
 337 injection from 3 (for Fsk) and 3 (for PBS) independent experiments.

338 (d) Quantification of  $\Delta F/F_0$  in the above conditions. Data are shown as mean  $\pm$  SEM  
 339 overlaid with data points from individual cells.  $n = 73$  cells from 4 animals for G-Flamp1  
 340 with Fsk group, 86 cells from 3 animals for G-Flamp1 with PBS group, 93 cells from 3  
 341 animals for G-Flamp1-mut with Fsk group, 92 cells from 3 animals for G-Flamp1-mut  
 342 with PBS group. Two-tailed Student's *t*-tests were performed.  $P = 1.7 \times 10^{-13}$ ,  $2.1 \times 10^{-13}$   
 343 and  $7.4 \times 10^{-14}$  between G-Flamp1 with Fsk group and G-Flamp1 with PBS, G-Flamp1-

344 mut with Fsk and G-Flamp1-mut with PBS groups, respectively. \*\*\* $P < 0.001$ . Source  
345 data are provided as a Source Data file.

346

347

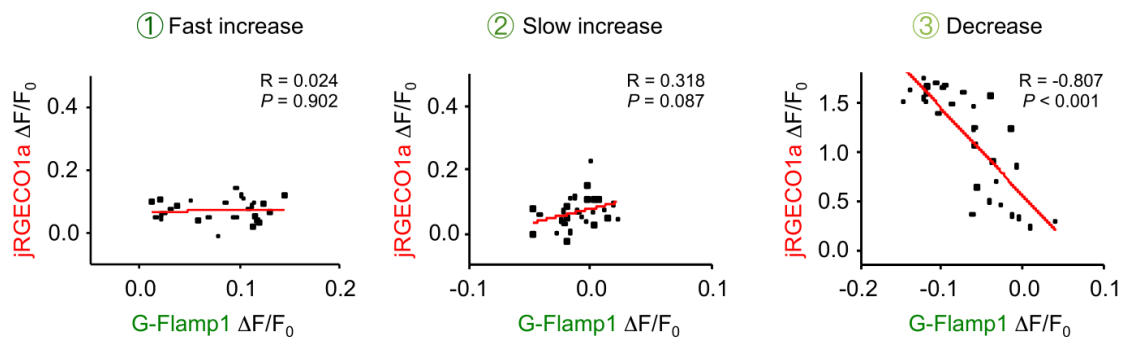

348

349 **Supplementary Fig. 21 Pearson correlation analysis of time series between G-**

350 **Flamp1 and jRGECO1a signals in Fig. 4f.** Each group includes 30 time points during

351 0~20 s after running onset. The Pearson's correlation values (R) for the 'fast increase',

352 'slow increase' and 'decrease' groups were 0.024, 0.318 and -0.807, respectively. Two-

353 tailed Student's *t*-tests were performed and *P* values are also shown. Source data are

354 provided as a Source Data file.

355

356

357

358

359

360

361

362

363 **2. Supplementary Tables**

364 **Supplementary Table 1 Biophysical and biochemical properties of purified G-**  
 365 **Flamp1.**

366

| cAMP sensor | Ex/Em <sup>a</sup><br>(nm),<br>free <sup>b</sup> | Ex/Em<br>(nm),<br>bound <sup>c</sup> | $\Delta F/F_0$<br>(450<br>nm) <sup>d</sup> | $K_d$<br>( $\mu\text{M}$ ) <sup>e</sup> | $n_H$ <sup>f</sup> | $k_{on}$<br>( $\mu\text{M}^{-1}\text{s}^{-1}$ ) <sup>g</sup> | $k_{off}$<br>( $\text{s}^{-1}$ ) <sup>h</sup> | pKa <sup>i</sup> ,<br>free | pKa,<br>bound | EC <sup>j</sup> ,<br>free<br>( $\text{M}^{-1}\text{cm}^{-1}$ ) | EC,<br>bound<br>( $\text{M}^{-1}\text{cm}^{-1}$ ) | QY <sup>k</sup> ,<br>free | QY,<br>bound |
|-------------|--------------------------------------------------|--------------------------------------|--------------------------------------------|-----------------------------------------|--------------------|--------------------------------------------------------------|-----------------------------------------------|----------------------------|---------------|----------------------------------------------------------------|---------------------------------------------------|---------------------------|--------------|
| G-Flamp1    | 500/513                                          | 490/510                              | 13.4                                       | 2.17                                    | 1.13               | 3.48                                                         | 7.9                                           | 8.27                       | 6.95          | 4374                                                           | 25280                                             | 0.323                     | 0.322        |

367

368 <sup>a</sup>Excitation peak/Emission peak. <sup>b</sup>cAMP-free form of G-Flamp1. <sup>c</sup>cAMP-bound form of  
 369 G-Flamp1. <sup>d</sup>Maximum fluorescence change under 450 nm excitation. <sup>e</sup>Dissociation  
 370 constant. <sup>f</sup>Hill coefficient. <sup>g</sup>Association rate constant. <sup>h</sup>Dissociation rate constant. <sup>i</sup>The pH  
 371 at which the fluorescence intensity is half-maximal. <sup>j</sup>Extinction coefficient. <sup>k</sup>Quantum  
 372 yield.

373

374 **Supplementary Table 2 Molecular brightness and fluorescence change of GCaMP**  
 375 **sensors<sup>1</sup>.**

376

| Sensor   | $\Delta F/F_0$ <sup>a</sup> | EC <sup>b</sup> × QY <sup>c</sup><br>ratio<br>(bound/free) | EC,<br>free <sup>d</sup><br>( $\text{M}^{-1}\text{cm}^{-1}$ ) | EC, bound <sup>e</sup><br>( $\text{M}^{-1}\text{cm}^{-1}$ ) | QY,<br>free | QY,<br>bound |
|----------|-----------------------------|------------------------------------------------------------|---------------------------------------------------------------|-------------------------------------------------------------|-------------|--------------|
| GCaMP6f  | 39                          | 27                                                         | 2761                                                          | 66293                                                       | 0.57        | 0.66         |
| jGCaMP7s | 39                          | 10                                                         | 5554                                                          | 53068                                                       | 0.58        | 0.65         |
| jGCaMP7c | 144                         | 38                                                         | 1541                                                          | 49566                                                       | 0.5         | 0.59         |
| jGCaMP7b | 21                          | 10                                                         | 5668                                                          | 56462                                                       | 0.59        | 0.6          |

377

378 <sup>a</sup>Maximum fluorescence change. <sup>b</sup>Extinction coefficient. <sup>c</sup>Quantum yield. <sup>d</sup>Ca<sup>2+</sup>-free  
 379 form. <sup>e</sup>Ca<sup>2+</sup>-bound form.

380

381

382 **Supplementary Table 3 List of current cAMP indicators<sup>2-5</sup>.**

383

| Sensor (year <sup>a</sup> )                                                    | K <sub>d</sub> <sup>d</sup> for cAMP (μM) | K <sub>d</sub> for cGMP (μM) | ΔR/R <sub>0</sub> or ΔF/F <sub>0</sub> <sup>e</sup><br>(purified sensor) | ΔR/R <sub>0</sub> or ΔF/F <sub>0</sub><br>(in cells or cell lysate) |
|--------------------------------------------------------------------------------|-------------------------------------------|------------------------------|--------------------------------------------------------------------------|---------------------------------------------------------------------|
| CFP-(δDEP,CD)-YFP<br>(2004) <sup>b</sup>                                       | 14                                        | Insensitive to cGMP          | n.d.                                                                     | -0.45                                                               |
| <sup>T</sup> Epac1 <sup>VV</sup> /Epac-S <sup>H74</sup><br>(2011) <sup>b</sup> | ~10                                       | n.d.                         | n.d.                                                                     | ~0.82                                                               |
| Epac-S <sup>H187</sup> (2015) <sup>b</sup>                                     | ~4                                        | n.d.                         | n.d.                                                                     | ~1.6                                                                |
| cAMPFIRE-L (2021) <sup>b</sup>                                                 | 2.65                                      | n.d.                         | n.d.                                                                     | ~2.7                                                                |
| cAMPFIRE-M (2021) <sup>b</sup>                                                 | 1.41                                      | n.d.                         | n.d.                                                                     | ~3.2                                                                |
| cAMPFIRE-H (2021) <sup>b</sup>                                                 | 0.38                                      | n.d.                         | n.d.                                                                     | ~3.3                                                                |
| ICUE1 (2004) <sup>b</sup>                                                      | n.d.                                      | n.d.                         | n.d.                                                                     | ~0.3                                                                |
| ICUE2 (2008) <sup>b</sup>                                                      | 12.5                                      | n.d.                         | n.d.                                                                     | ~0.6                                                                |
| ICUE3 (2009) <sup>b</sup>                                                      | n.d.                                      | n.d.                         | n.d.                                                                     | ~1.0                                                                |
| Epac1-camps (2004) <sup>b</sup>                                                | 2.35                                      | n.d.                         | n.d.                                                                     | ~0.24                                                               |
| Epac2-camps300<br>(2009) <sup>b</sup>                                          | 0.3                                       | 14                           | n.d.                                                                     | ~0.8                                                                |
| mICNBD-FRET<br>(2016) <sup>b</sup>                                             | 0.07                                      | 0.5                          | ~0.4                                                                     | ~0.47                                                               |
| CUTie (2017) <sup>b</sup>                                                      | 7.4                                       | n.d.                         | n.d.                                                                     | ~0.23                                                               |
| cAMPPr (2018) <sup>c</sup>                                                     | 1                                         | No response to 1 mM<br>cGMP  | n.d.                                                                     | ~0.5; 0.45 <sup>f</sup>                                             |
| Flamindo2 (2014) <sup>c</sup>                                                  | 3.2                                       | 22                           | -0.75                                                                    | -0.7; -0.25 <sup>f</sup> , -0.75 <sup>f,g</sup>                     |
| cADDis (2016) <sup>c</sup>                                                     | 10-100                                    | n.d.                         | -0.55                                                                    | n.d.                                                                |
| Pink Flamindo (2017) <sup>c</sup>                                              | 7.2                                       | 94                           | 3.2                                                                      | 1.30; 0.88 <sup>f</sup>                                             |
| R-FliucA (2018) <sup>c</sup>                                                   | 0.3                                       | 6.6                          | 7.6                                                                      | 6.0; 1.5 <sup>f</sup>                                               |

384

385 <sup>a</sup>Publication year. <sup>b</sup>FRET-based cAMP indicators. <sup>c</sup>Single-FP cAMP indicators.

386 <sup>d</sup>Dissociation constant. <sup>e</sup>The maximum ratio change (ΔR/R<sub>0</sub>) and maximum fluorescence

387 change (ΔF/F<sub>0</sub>) for FRET sensors and single-FP sensors, respectively. <sup>f</sup>Measured in this

388 study. HEK293T cells were cultured at 37 °C. <sup>g</sup>Value was obtained under two-photon

389 excitation. n.d.: not determined.

390

391

392

393

394

395



396 **Supplementary Table 4 Data collection and structure refinement statistics.**

| G-Flamp1 (PDB 6M63)                                                            |                                                       |
|--------------------------------------------------------------------------------|-------------------------------------------------------|
| <b>Data collection</b>                                                         |                                                       |
| Space group                                                                    | <i>P</i> 2 <sub>1</sub> 2 <sub>1</sub> 2 <sub>1</sub> |
| Cell dimensions                                                                |                                                       |
| <i>a</i> , <i>b</i> , <i>c</i> (Å)                                             | 87.84, 94.69, 109.99                                  |
| α, β, γ (°)                                                                    | 90.00, 90.00, 90.00                                   |
| Resolution (Å)                                                                 | 50.00-2.25 (2.29-2.25)*                               |
| <i>R</i> <sub>merge</sub> **                                                   | 0.15 (1.01)                                           |
| <i>I</i> / σ <i>I</i>                                                          | 36.36 (4.45)                                          |
| Completeness (%)                                                               | 100.00 (100.00)                                       |
| Redundancy                                                                     | 14.50 (13.80)                                         |
| <b>Refinement</b>                                                              |                                                       |
| Resolution (Å)                                                                 | 47.34-2.25 (2.33-2.25)                                |
| No. reflections                                                                | 43,987 (4,114)                                        |
| <i>R</i> <sub>work</sub> <sup>#</sup> / <i>R</i> <sub>free</sub> <sup>##</sup> | 0.18/0.22                                             |
| No. atoms                                                                      | 5,857                                                 |
| Protein                                                                        | 5,448                                                 |
| Ligand/ion                                                                     | 44                                                    |
| Water                                                                          | 365                                                   |
| <i>B</i> -factors                                                              | 37.61                                                 |
| Protein                                                                        | 37.16                                                 |
| Ligand/ion                                                                     | 28.42                                                 |
| Water                                                                          | 45.50                                                 |
| R.m.s. deviations                                                              |                                                       |
| Bond lengths (Å)                                                               | 0.007                                                 |
| Bond angles (°)                                                                | 0.900                                                 |
| Ramachandran favored (%)                                                       | 98.15                                                 |
| Ramachandran allowed (%)                                                       | 1.85                                                  |
| Ramachandran outliers (%)                                                      | 0.00                                                  |

397

398 \*Statistics for the highest-resolution shell are shown in parentheses.

399 \*\* $R_{\text{merge}} = \frac{\sum_{hkl} \sum_i |I_i(hkl) - \langle I(hkl) \rangle|}{\sum_{hkl} \sum_i I_i(hkl)}$ , where  $I_i(hkl)$  is the intensity  
400 measured for the  $i$  th reflection and  $\langle I(hkl) \rangle$  is the average intensity of all reflections  
401 with indices  $hkl$ .

402  $R_{\text{work}} = \frac{\sum_{hkl} ||F_{\text{obs}}(hkl) - |F_{\text{calc}}(hkl)||}{\sum_{hkl} |F_{\text{obs}}(hkl)|}$ .

403 <sup>##</sup> $R_{\text{free}}$  is calculated in an identical manner using 10% of randomly selected reflections  
404 that were not included in the refinement.

**Supplementary Table 5 Key parameters for fluorescence imaging data collection.**

| Figure | Cell                                            | Indicator or FP                        | Microscope                                    | Objective    | Excitation | Emission      | Frame interval                                                                        |
|--------|-------------------------------------------------|----------------------------------------|-----------------------------------------------|--------------|------------|---------------|---------------------------------------------------------------------------------------|
| 2a     | HEK293T                                         | GCaMP6s, cAMPr,<br>Flamindo2, G-Flamp1 | IX83                                          | 20 × 0.75 NA | 480/30 nm  | 530/30 nm     | -                                                                                     |
| 2c     | HEK293T                                         | G-Flamp1,<br>G-Flamp1-mut              | IX83                                          | 60 × 1.35 NA | 441/20 nm  | 530/30 nm     | 15 s                                                                                  |
| 2d-e   | HEK293T                                         | G-Flamp1                               | IX83                                          | 60 × 1.35 NA | 441/20 nm  | 530/30 nm     | 15 s                                                                                  |
| 2d-e   | HEK293T                                         | cAMPr, Flamindo2                       | IX83                                          | 60 × 1.35 NA | 480/30 nm  | 530/30 nm     | 15 s                                                                                  |
| 2d-e   | HEK293T                                         | Pink Flamindo, R-FlincA                | IX83                                          | 60 × 1.35 NA | 568/20 nm  | 630/50 nm     | 15 s                                                                                  |
| 2f-g   | HEK293T                                         | G-Flamp1                               | IX83                                          | 60 × 1.35 NA | 441/20 nm  | 530/30 nm     | 15 s                                                                                  |
| 2h-i   | Cultured<br>mouse<br>cortical<br>neurons        | G-Flamp1                               | IX83                                          | 20 × 0.75 NA | 441/20 nm  | 530/30 nm     | 15 s                                                                                  |
| 3d-f   | Fly Kenyon<br>cells                             | G-Flamp1, GFP                          | Olympus<br>FV1000                             | 25 × 1.05 NA | 930 nm     | 495-540<br>nm | 0.15 s (odor puff)<br>0.15 s (electrical<br>shock)<br>1 s (Fsk<br>perfusion)<br>0.67s |
| 4b-d   | Mouse<br>cortical<br>neurons <i>in<br/>vivo</i> | G-Flamp1,<br>G-Flamp1-mut              | Bruker<br>Ultima<br>Investigator              | 16 × 0.8 NA  | 920 nm     | 490-560<br>nm | 0.67s                                                                                 |
| 4b-d   | Mouse<br>cortical<br>neurons <i>in<br/>vivo</i> | jRGECO1a                               | Bruker<br>Ultima<br>Investigator              | 16 × 0.8 NA  | 920 nm     | 570-620<br>nm | 0.67s                                                                                 |
| S1b    | HEK293T                                         | cAMPr, Flamindo2                       | IX83                                          | 60 × 1.35 NA | 480/30 nm  | 530/30 nm     | 15 s                                                                                  |
| S1b    | HEK293T                                         | Pink Flamindo,<br>R-FlincA             | IX83                                          | 60 × 1.35 NA | 568/20 nm  | 630/50 nm     | 15 s                                                                                  |
| S1d    | HEK293T                                         | R-FlincA                               | IX83                                          | 60 × 1.35 NA | 568/20 nm  | 630/50 nm     | -                                                                                     |
| S12a   | HEK293T                                         | Flamindo2, cAMPr,<br>G-Flamp1          | Nikon-TI<br>two-photon<br>microscope          | 25 × 1.4 NA  | 920 nm     | 495-532<br>nm | -                                                                                     |
| S12b-d | HEK293T                                         | Flamindo2, cAMPr,<br>G-Flamp1          | Nikon-TI<br>two-photon<br>microscope          | 25 × 1.4 NA  | 920 nm     | 495-532<br>nm | 5 s                                                                                   |
| S14a   | HeLa                                            | G-Flamp1                               | IX83                                          | 60 × 1.35 NA | 441/20 nm  | 530/30 nm     | 15 s                                                                                  |
| S14b   | CHO                                             | G-Flamp1                               | IX83                                          | 60 × 1.35 NA | 441/20 nm  | 530/30 nm     | 15 s                                                                                  |
| S16    | HEK293T                                         | G-Flamp1                               | IX83                                          | 60 × 1.35 NA | 480/30 nm  | 530/30 nm     | 15 s                                                                                  |
| S16    | HEK293T                                         | G-Flamp1                               | IX83                                          | 60 × 1.35 NA | 441/20 nm  | 530/30 nm     | 15 s                                                                                  |
| S17    | HEK239T                                         | G-Flamp1,<br>G-Flamp1-mut              | Leica TSC<br>SP8 two-<br>photon<br>microscope | 25 × 0.95 NA | 920 nm     | 495-550<br>nm | -                                                                                     |
| S18    | HEK293T                                         | G-Flamp1                               | IX83                                          | 60 × 1.35 NA | 441/20 nm  | 530/30 nm     | 15 s                                                                                  |
| S18    | HEK293T                                         | Green cGull                            | IX83                                          | 60 × 1.35 NA | 480/30 nm  | 530/30 nm     | 15 s                                                                                  |
| S19    | Cultured<br>mouse<br>cortical<br>neurons        | G-Flamp1                               | IX83                                          | 20 × 0.75 NA | 441/20 nm  | 530/30 nm     | 15 s                                                                                  |
| S20b-d | Zebrafish<br>cells <i>in vivo</i>               | G-Flamp1,<br>G-Flamp1-mut              | Olympus<br>BX61WI<br>two-photon<br>microscope | 25 × 1.05 NA | 960 nm     | 495-540<br>nm | 1 s                                                                                   |

406

407 **3. Supplementary References**

- 408 1. Dana, H. et al. High-performance calcium sensors for imaging activity in neuronal  
409 populations and microcompartments. *Nature Methods* **16**, 649-657 (2019).
- 410 2. Jiang, J.Y., Falcone, J.L., Curci, S. & Hofer, A.M. Interrogating cyclic AMP  
411 signaling using optical approaches. *Cell Calcium* **64**, 47-56 (2017).
- 412 3. Klausen, C., Kaiser, F., Stüven, B., Hansen, J.N. & Wachten, D. Elucidating  
413 cyclic AMP signaling in subcellular domains with optogenetic tools and  
414 fluorescent biosensors. *Biochemical Society Transactions* **47**, 1733-1747 (2019).
- 415 4. Dikolayev, V., Tuganbekov, T. & Nikolaev, V.O. Visualizing Cyclic Adenosine  
416 Monophosphate in Cardiac Microdomains Involved in Ion Homeostasis. *Front*  
417 *Physiol* **10**, 1406 (2019).
- 418 5. Massengill, C.I. et al. Highly sensitive genetically-encoded sensors for population  
419 and subcellular imaging of cAMP in vivo. *Preprint at bioRxiv*  
420 <https://www.biorxiv.org/content/10.1101/2021.08.27.457999v1> (2021).
- 421
